# Supplementary material for: App Chronic Disease Checklist: Protocol to Evaluate Mobile Apps for Chronic Disease Self-Management
Source: PubMed Central journal article supplement (PMC5116100; doi:10.2196/resprot.6194), 2016-11-04
Supplement: resprot_v5i4e204_app2.pdf [file resprot_v5i4e204_app2.pdf]

Multimedia Appendix 2. Instructions for raters.

| <b>Step</b>                                    | <b>Preparation tasks</b>                                                                                                                                                                                     | <b>Required Kit</b>                                                                          | <b>ACDC Reference</b>                                                                           |
|------------------------------------------------|--------------------------------------------------------------------------------------------------------------------------------------------------------------------------------------------------------------|----------------------------------------------------------------------------------------------|-------------------------------------------------------------------------------------------------|
| <b>1</b>                                       | Assemble the list of apps retained by the PRISMA flow diagram<br>Use www.random.org to select which apps all raters are to assess in the same order (thus minimising the risk of updates influencing scores) | Retained app names<br>www.random.org                                                         |                                                                                                 |
| <b>2</b>                                       | Install each clinical management app from respective app store                                                                                                                                               | Mobile device with internet connection, completed PRISMA flow diagram to determine which app |                                                                                                 |
| <b>3</b>                                       | Follow displayed instructions for new users such as establishing or registering a user profile                                                                                                               | Smartphone with internet connection                                                          | Ease of Use: User Profile Setup                                                                 |
| <b>4</b>                                       | Use dummy profile data in Figure 2 as created by own lead investigator and insert clinical values                                                                                                            | Smartphone with internet connection, dummy profile data (Figure 2)                           |                                                                                                 |
| <b>5</b>                                       | Spend five minutes familiarizing yourself with the app<br>Close the app completely then re-open it                                                                                                           | Smartphone with internet connection                                                          |                                                                                                 |
| <b>Observations during Clinical Data Entry</b> |                                                                                                                                                                                                              |                                                                                              |                                                                                                 |
|                                                | When performing clinical data entry below:                                                                                                                                                                   |                                                                                              |                                                                                                 |
| <b>6</b>                                       | Note the visual appeal of the user interface                                                                                                                                                                 | Refer to Step 3                                                                              | Functionality: Graphics and Visual Appeal                                                       |
| <b>7</b>                                       | Identify sequential, structural navigation                                                                                                                                                                   | Refer to Step 3                                                                              | Functionality: Structural Navigation                                                            |
| <b>8</b>                                       | Recall responsiveness of app features and components                                                                                                                                                         | Refer to Step 3                                                                              | Functionality: Performance Power                                                                |
| <b>9</b>                                       | Observe medical or technical jargon                                                                                                                                                                          | Refer to Step 3                                                                              | Ease of Use: Medical and Technical Jargon                                                       |
| <b>Clinical data entry</b>                     |                                                                                                                                                                                                              |                                                                                              |                                                                                                 |
| <b>10</b>                                      | Enter clinical measures such as peak flow readings for one week using healthy range values as per Figure 3                                                                                                   | Lead investigator to input dummy profile and set of readings similar to Figure 2 + 3         | Functionality: Intuitive Design<br><br>Information Management: Quality and Accurate Information |
| <b>11</b>                                      | Enter clinical measures (as appropriate) for one week using uncontrolled and unhealthy range values and some missing values (Figure 3 is a guide)                                                            | As above                                                                                     | Functionality: Intuitive Design<br><br>Information                                              |

|                                                                   |                                                                                                                                                      |                                       |                                                                 |
|-------------------------------------------------------------------|------------------------------------------------------------------------------------------------------------------------------------------------------|---------------------------------------|-----------------------------------------------------------------|
|                                                                   |                                                                                                                                                      |                                       | Management:<br>Quality and Accurate<br>Information              |
| <b>App functionality permitting, complete the following tasks</b> |                                                                                                                                                      |                                       |                                                                 |
| 12                                                                | Note any health warnings provided when inputting unhealthy range values                                                                              | Refer to Step 3                       | Functionality:<br>Health Warnings                               |
| 13                                                                | Respond to feedback provided by app such as personal strengths or limitations                                                                        | Refer to Step 3                       | Engagement:<br>Self-Awareness                                   |
| 14                                                                | View graphical representation of inputted data in graph and numerical form                                                                           | Refer to Step 3                       | Information<br>Management:<br>Visual Information                |
| 15                                                                | Add notes to data entries e.g. high blood pressure due to weightlifting class                                                                        | Refer to Step 3                       | Engagement:<br>Interactivity                                    |
| 16                                                                | Email the data or outputs to yourself and another rater<br>Ensure emailed data (e.g. .xls, .csv) is readable without significant formatting required | Smartphone mail configuration         | Functionality:<br>Connection to Services                        |
| 17                                                                | Access points/rewards system – have your readings accrued any points?                                                                                | Refer to Step 3                       | Engagement:<br>Gamification                                     |
| 18                                                                | Add goals<br>(lead investigator should devise appropriate goal(s) as part of the dummy readings to be entered)                                       | Refer to Step 3                       | Engagement:<br>Self-Awareness<br>+ Positive Behaviour<br>Change |
| 19                                                                | Create in-app calendar entry                                                                                                                         | Smartphone calendar sync              | Functionality:<br>Feedback                                      |
| 20                                                                | Initiate daily medication reminder 06:30                                                                                                             | Refer to Step 3                       | Ease of Use:<br>Reminders                                       |
| 21                                                                | Attempt to interact with other nominated users or support services (e.g. a helpline)                                                                 | Refer to Step 3                       | Functionality:<br>Connection to Services                        |
| 22                                                                | Attempt to change settings (e.g. fonts, colours, notifications)                                                                                      | Refer to Step 3                       | Engagement:<br>Customisation                                    |
| 23                                                                | Navigate to statistics screen and produce multiple views of data, e.g. weekly and/or monthly                                                         | Refer to Step 3                       | Information<br>Management:<br>Statistics                        |
| 24                                                                | Locate user prompts regarding lifestyle tips or behavioral advice based on user input, e.g. ramifications of medication overuse                      | Refer to Step 3                       | Engagement: Positive<br>Behaviour Change                        |
| 25                                                                | Locate option to connect app to peripheral device, e.g. Bluetooth monitor                                                                            | Peripheral device and refer to Step 3 | Engagement:<br>Use of Plug-ins                                  |
| 26                                                                | Is another health app required to supplement features not available in this app?                                                                     | Refer to Step 3                       | Ease of Use:<br>Holistic Usability                              |
| 27                                                                | Identify automated app features such as                                                                                                              | Refer to Step 3                       | Ease of Use:                                                    |

|           |                                                                                          |                                        |                                                      |
|-----------|------------------------------------------------------------------------------------------|----------------------------------------|------------------------------------------------------|
|           | pre-populated fields and appointment management                                          |                                        | Automation                                           |
| <b>28</b> | Identify password management option, privacy statement, cloud backup and data encryption | Refer to Step 3                        | Information Management:<br>Privacy and Data Security |
| <b>29</b> | Observe extent of information provided for mobile experience                             | Refer to Step 3                        | Information Management:<br>Quantity of Information   |
| <b>30</b> | Recognize credible source of app, e.g. government lab logo, cites published research     | Smartphone without internet connection | Information Management:<br>Credibility               |
| <b>31</b> | Turn off internet connection and test clinical data input and output displays            | Smartphone without internet connection | Ease of Use:<br>Offline Mode                         |
